# Supplementary material
Source: PubMed Central journal article supplement (PMC2717022)
Supplement: NIHMS109560-supplement-1.pdf [file NIHMS109560-supplement-1.pdf]

## Supplemental Figure Legends

**Supplemental Figure 1: Effect of PPAR $\gamma$  antagonists on 15d-PGJ2 induced cytoplasmic vacuolation and cell death:** HCT116 cells were pretreated with PPAR $\gamma$  antagonists GW9662 (20  $\mu$ M) or T0070907 (20  $\mu$ M) for 1h prior to the addition of 15d-PGJ2. Phase contrast image showing the failure of PPAR $\gamma$  antagonists in preventing 15d-PGJ2 induced cytoplasmic vacuolation (A) and cell death as measured by clonogenic assay (B).

**Supplemental Figure 2: Quantitation of Bip and CHOP proteins in normal and 15d-PGJ2 treated cells.**

Densitometric analysis was performed on immunoblots for Bip and CHOP proteins with dose response and time course of 15d-PGJ2 treatment. Protein levels were normalized to the levels of GAPDH expression. Fold increase in protein levels over control cells were plotted. Shown are the averages of three independent experiments  $\pm$  SE for dose response and average of two experiments for time course.

**Supplemental Figure 3: Quantitation of LC3-I and II proteins in normal and 15d-PGJ2 treated cells.** Quantitation of LC3 by Densitometry analysis was performed as in Supplemental Figure 2. Protein levels were normalized to the levels of GAPDH expression. Fold increase in LC3-I and LC3-II in 15d-PGJ2 treated cells over control cells was plotted. Shown are the averages of three independent experiments  $\pm$  SE.

**Supplemental Figure 4: Effect of cycloheximide and actinomycin D on 15d-PGJ2 induced ER stress and LC3 processing:** Immunoblot showing the effect of CHX (25 or 50  $\mu$ M) and Act D (8 or 16  $\mu$ M) on the expression of ER stress markers Bip and CHOP, and induction and processing of LC3. Both the inhibitors blocked 15d-PGJ2 induced changes in Bip, CHOP and LC3. Inhibitors were added to cells 1h prior to the addition of 15d-PGJ2.

**Supplemental Figure 5: Comparison of the effects of PGD2 and cyclopentenone prostaglandins PGA1, PGA2 and 15d-PGJ2 on HCT116 cells:** A. Phase contrast image showing effect of 15d-PGJ2 (20  $\mu$ M), PGA1 (20  $\mu$ M), PGA2 (20  $\mu$ M) and PGD2 (20  $\mu$ M) on HCT116 cells treated for 9h. Unlike 15d-PGJ2, its precursor PGD2 or other cyclopentenone prostaglandins (PGA1 and PGA2) did not induce cytoplasmic vacuolation and these treated cells resemble untreated HCT116 cells (not shown). Even at 40  $\mu$ M concentration, all three prostaglandins PGA1, PGA2 and PGD2 failed to induce cytoplasmic vacuolation in HCT116 cells (not shown). B. Western blot showing effect of 15d-PGJ2, PGA1, PGA2 and PGD2 on expression of Bip, CHOP and LC3. PGA1 and PGA2 were less potent than 15d-PGJ2 in inducing ER stress or LC3 expression.

**Supplemental Figure 6: Accumulation of p62 (SQSTM1) protein during cytoplasmic vacuolation but not in autophagy.** A. HCT116 cells were treated with 15d-PGJ2 for cytoplasmic vacuolation or serum starved for autophagy. Total extracts were collected and analyzed for p62 by immunoblotting. Note the increase in p62 levels upon 15d-PGJ2 treatment. The endosomal marker, EEA1 levels are nearly unchanged. B. Cellular distribution of p62 and EEA1, an endosomal marker, during vacuolation induced by 15d-PGJ2 (PGJ) or autophagy by serum starvation (STR) by immunofluorescence.

**Supplemental Figure 7: Lamp1 distribution is unaffected during 15d-PGJ2 induced cytoplasmic vacuolation.** Cellular distribution of ER marker Calnexin and lysosomal marker LAMP1 in normal (CON) and vacuolated (15d-PGJ2) cells was observed by immunofluorescence. Lysosomal distribution in the cells is unaffected by 15d-PGJ2 treatment.

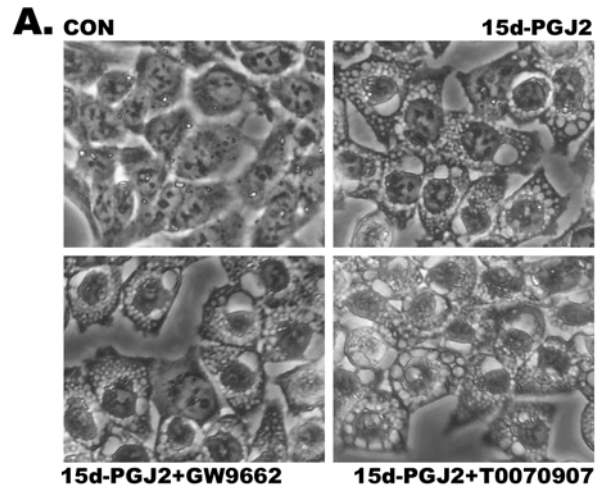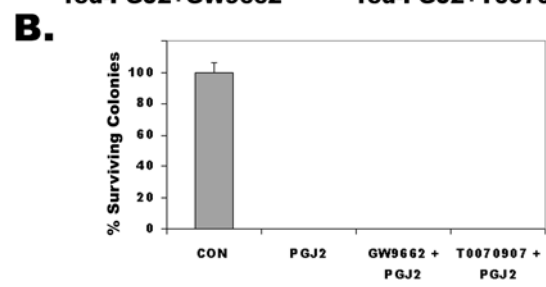

Kar et al Supplemental Figure 1

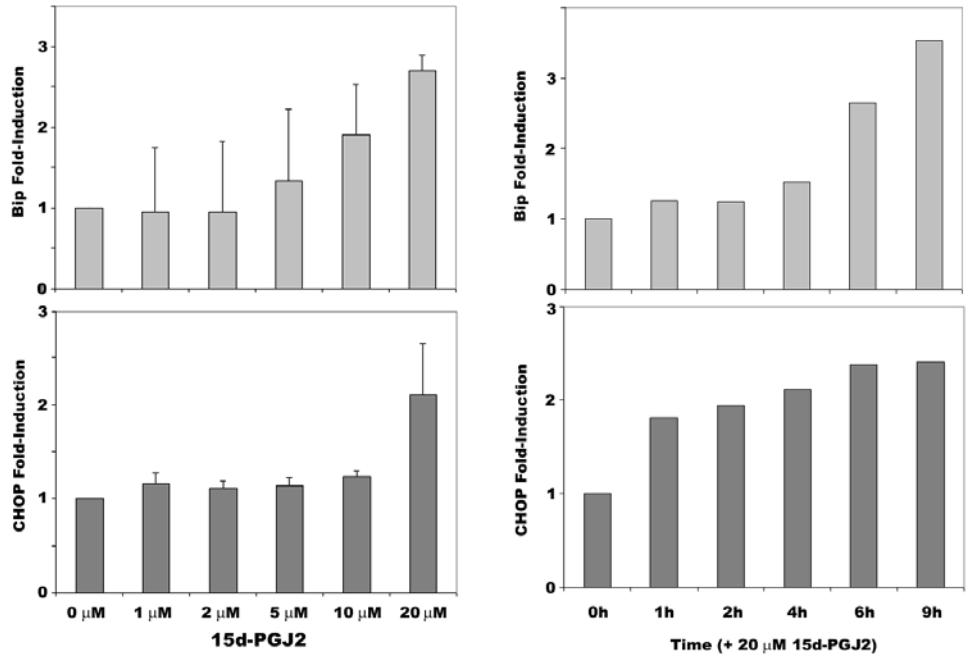

Kar et al Supplemental Figure 2

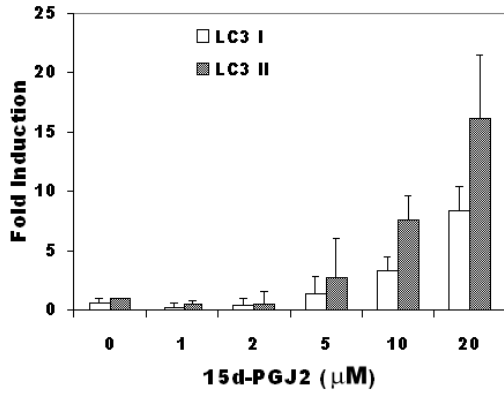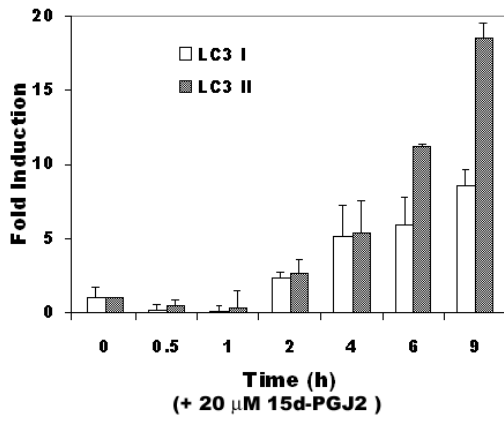

Kar et al Supplemental Figure 3

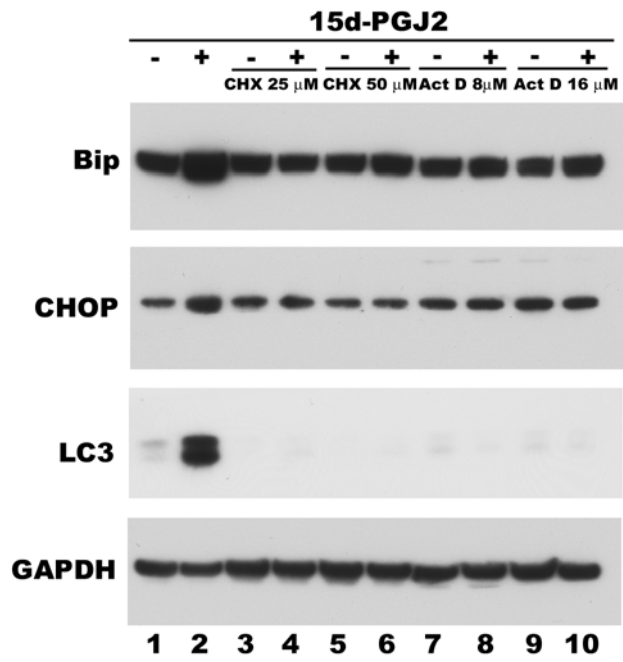

Kar et al Supplemental Figure 4

**A.**

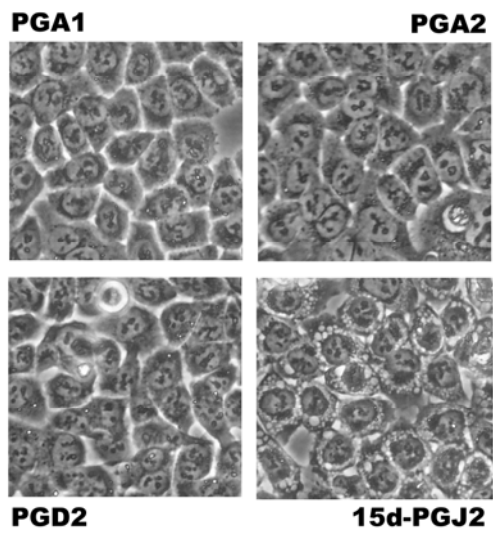

**B.**

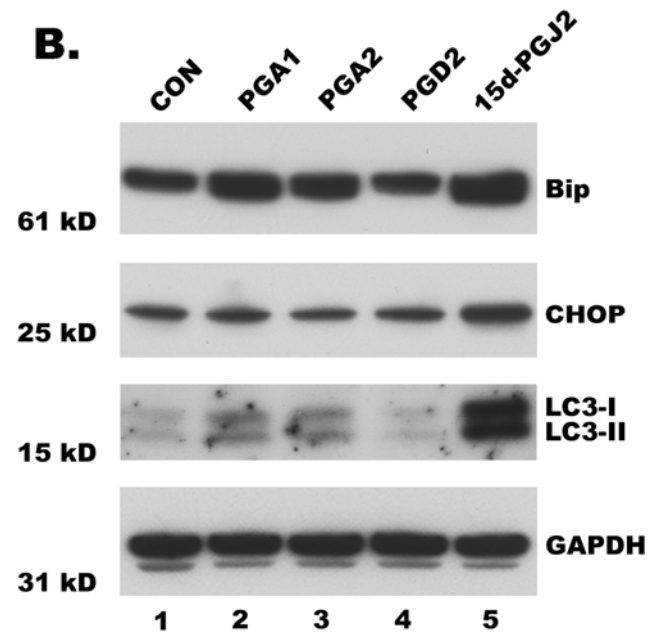

Kar et al Supplemental Figure 5

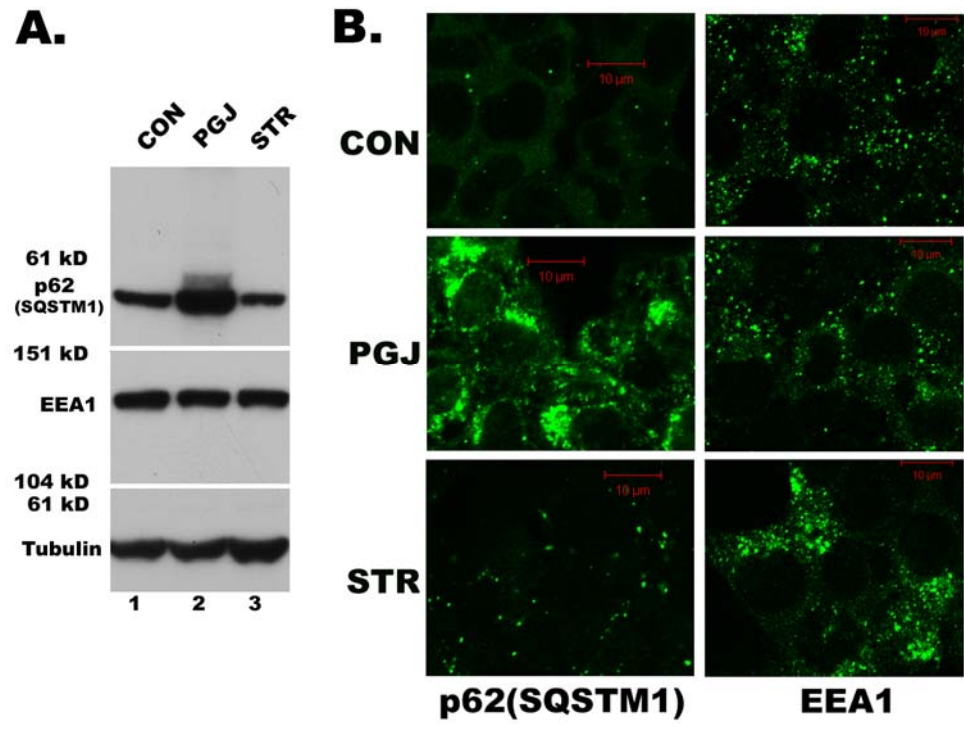

Kar et al Supplemental Figure 6



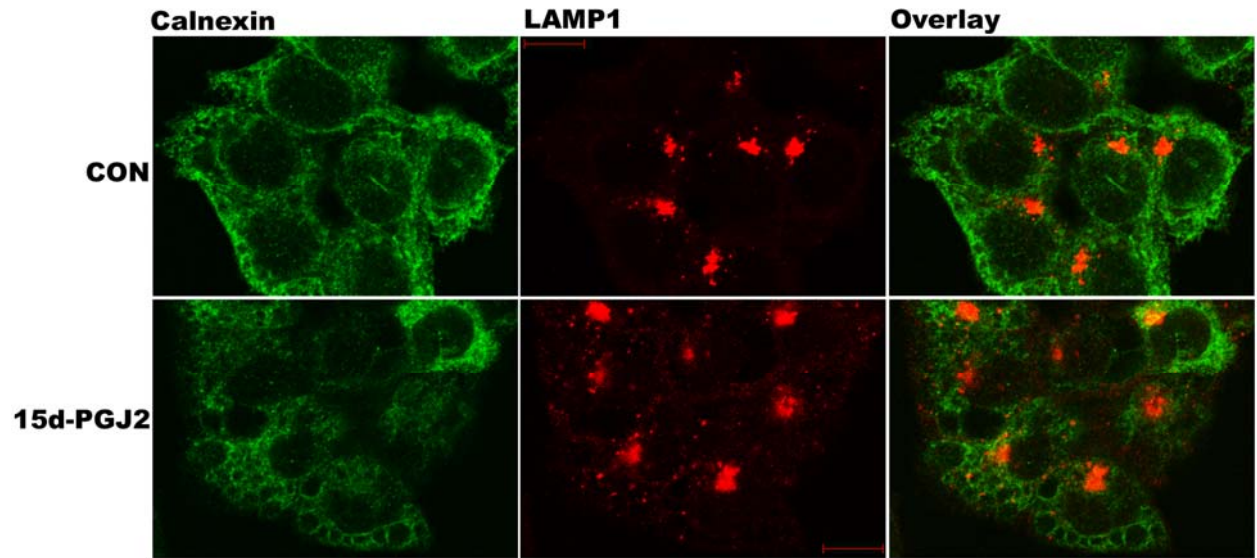

Kar et al Supplemental Figure 7
